# Supplementary material for: Marine-Derived Leads as Anticancer Candidates by Disrupting Hypoxic Signaling through Hypoxia-Inducible Factors Inhibition
Source: MDPI journal article supplement (doi:10.3390/md22040143), 2024-03-23
Supplement: s1 [file s1]

**Table S1. Marine natural products impacting HIF signalling pathways**

| Number             | Compound                      | Source of isolation | References     |
|--------------------|-------------------------------|---------------------|----------------|
| <b>Peptides</b>    |                               |                     |                |
| 1                  | Actinomycin D                 | Bacteria            | [57, 58]       |
| 2                  | Cyclosporin A                 | Fungi               | [63]           |
| 3                  | Aplidin                       | Tunicate            | [65]           |
| 4                  | Oligomycin A                  | Bacteria            | [68, 69]       |
| 5                  | Antimycin A                   | Bacteria            | [72]           |
| 6                  | Triostin A                    | Bacteria            | [82]           |
| 7                  | Echinomycin                   | Bacteria            | [82]           |
| 8                  | Chetomin                      | Fungi               | [84, 85]       |
| 9                  | Chaetocin                     | Fungi               | [84, 85]       |
| 10                 | Gliotoxin                     | Fungi               | [97-99]        |
| 11                 | Kalkitoxin                    | Cyanobacteria       | [100]          |
| 12                 | Dolastatin-15                 | Sea hare            | [103]          |
| <b>Alkaloids</b>   |                               |                     |                |
| 13                 | Discorhabdin B dimer          | Sponge              | [115]          |
| 14                 | Discorhabdin B                | Sponge              | [115]          |
| 15                 | 3-Dihydrodiscorhabdin C       | Sponge              | [115]          |
| 16                 | Discorhabdin H                | Sponge              | [115]          |
| 17                 | Discorhabdin L                | Sponge              | [115]          |
| 18                 | Discorhabdin W                | Sponge              | [115]          |
| 19                 | Makaluvamine F                | Sponge              | [115]          |
| 20                 | Eudistidine A                 | Ascidian            | [118]          |
| 21                 | Fascaplysin                   | Sponge              | [119]          |
| 22                 | Caulerpin                     | Algae               | [126]          |
| 23                 | Mycalenitrile-6               | Sponge              | [128]          |
| 24                 | Mycalenitrile-7               | Sponge              | [128]          |
| 25                 | 7-Hydroxyneolamellarin A      | Sponge              | [140]          |
| 26                 | Neolamellarin A               | Sponge              | [142]          |
| 27                 | Wondonin                      | Sponge              | [143]          |
| <b>Polyketides</b> |                               |                     |                |
| 28                 | Psammaplin A                  | Sponge              | [146-153, 156] |
| 29                 | Bisaprasin                    | Sponge              | [156]          |
| 30                 | Cycloheximide                 | Bacteria            | [157]          |
| 31                 | Epolactaene                   | Fungi               | [162]          |
| 32                 | Latrunculin A                 | Sponge; Nudibranch  | [166-169]      |
| 33                 | Salternamide A                | Bacteria            | [173, 174]     |
| 34                 | Mycothiazole                  | Sponge              | [176, 177]     |
| 35                 | Novobiocin                    | Bacteria            | [183-186]      |
| 36                 | Echinochrome A                | Sea urchin          | [196, 197]     |
| 37                 | Emodin                        | Fungi               | [201-204]      |
| 38                 | Geldamycin                    | Bacteria            | [214-218]      |
| 39                 | Radicicol                     | Fungi               | [228]          |
| 40                 | N-formyl-1,2-dihydrorenierone | Sponge              | [230]          |
| 41                 | Adociaquinone A               | Sponge              | [231-233]      |
| 42                 | Adociaquinone B               | Sponge              | [231-233]      |

|                             |                                             |                 |                |
|-----------------------------|---------------------------------------------|-----------------|----------------|
| 43                          | 14-Hydroxymethylxestoquinone                | Sponge          | [233]          |
| 44                          | Herboxidiene                                | Bacteria        | [235, 236]     |
| <b>Phenolics</b>            |                                             |                 |                |
| 45                          | Coumarin dimer-1                            | Crinoid         | [240]          |
| 46                          | Coumarin dimer-2                            | Crinoid         | [240]          |
| 47                          | Coumarin-1                                  | Crinoid         | [240]          |
| 48                          | Coumarin-2                                  | Crinoid         | [240]          |
| 49                          | Coumarin-3                                  | Crinoid         | [240]          |
| 50                          | Coumarin-4                                  | Crinoid         | [240]          |
| 51                          | TMC-256A1                                   | Crinoid         | [240]          |
| 52                          | Comaparvin                                  | Crinoid         | [240]          |
| 53                          | Matairesinol                                | Marine seagrass | [241]          |
| 54                          | 7-Phloroeckol                               | Algae           | [243-246]      |
| 55                          | Manassantin A                               | Aquatic plant   | [248, 249]     |
| 56                          | Manassantin B                               | Aquatic plant   | [248, 249]     |
| 57                          | Manassantin B <sub>1</sub>                  | Aquatic plant   | [248, 249]     |
| 58                          | 4-O-Demethylmanassantin B                   | Aquatic plant   | [248, 249]     |
| 59                          | 4-O-methylsaucerneol                        | Aquatic plant   | [248, 249]     |
| 60                          | Naphthalene dimer                           | Sponge          | [250]          |
| <b>Sesquiterpenes</b>       |                                             |                 |                |
| 61                          | Diacetoxyscirpenol                          | Fungi; Bacteria | [251-253]      |
| 62                          | Dictyoceratin A                             | Sponge          | [255-259]      |
| 63                          | Dictyoceratin C                             | Sponge          | [255-259]      |
| 64                          | Puupehenone                                 | Sponge          | [230, 263-272] |
| <b>Diterpenes</b>           |                                             |                 |                |
| 65                          | Laurenditerpenol                            | Algae           | [276]          |
| 66                          | Strongylophorine-2                          | Sponge          | [280]          |
| 67                          | Strongylophorine-3                          | Sponge          | [280]          |
| 68                          | Strongylophorine-8                          | Sponge          | [280]          |
| 69                          | 13- <i>epi</i> -9-Deacetoxynenicin          | Coral           | [229]          |
| 70                          | 13- <i>epi</i> -9-Deacetylxicin             | Coral           | [229]          |
| 71                          | 13- <i>epi</i> -9-Deacetoxynenicin peroxide | Coral           | [229]          |
| <b>Norsesterterpenes</b>    |                                             |                 |                |
| 72                          | Diacarnoxide B                              | Sponge          | [281]          |
| <b>Furanosesterterpenes</b> |                                             |                 |                |
| 73                          | Furospinosulin-1                            | Sponge          | [256, 282-288] |
| 74                          | Furospingolide                              | Sponge          | [290-292]      |
| <b>Sesterterpenes</b>       |                                             |                 |                |
| 75                          | Thorectidaelide A                           | Sponge          | [293]          |
| 76                          | Acetoxylthorectidaelide A                   | Sponge          | [293]          |
| 77                          | Luffariellolide                             | Sponge          | [293-297]      |
| 78                          | Homoscalarane sesterterpene-1               | Sponge          | [250]          |
| 79                          | Homoscalarane sesterterpene-2               | Sponge          | [250]          |
| 80                          | Homoscalarane sesterterpene-3               | Sponge          | [250]          |

**Triterpenoids**

|    |                          |        |           |
|----|--------------------------|--------|-----------|
| 81 | Thyrsiferol              | Algae  | [300-305] |
| 82 | Sodwanone V              | Sponge | [307-315] |
| 83 | Sodwanone T              | Sponge | [307-315] |
| 84 | 10,11-Dihydrosodwanone B | Sponge | [307-315] |
| 85 | 3-epi-Sodwanone K        | Sponge | [307-315] |
| 86 | Sodwanone A              | Sponge | [307-315] |
| 87 | Stellettin B             | Sponge | [316-323] |
